# Supplementary material
Source: ML conference proceedings conference paper supplement (https://proceedings.mlr.press/v70/wu17a.html)
Supplement: Supplementary file [file wu17a-supp.pdf]

## A Appendix A: Proofs

In this section, we provide detailed proofs of the theoretical results presented in the manuscript.

### A.1 Proof of Theorem 4

Because  $F$  is label-wise effective, its order of prediction value on a specific instance  $x_i$  is correct. Therefore, the threshold error  $\epsilon_i$  can happen in either the two ways:

1.  $\epsilon_i$  positive labels are predicted as negative labels.

In this case, the true positive number  $TP_i$  on this instance becomes  $|Y_{i.}^+| - \epsilon_i$ , and the false positive number  $FP_i$  is zero, and the false negative number  $FN_i$  becomes  $\epsilon_i$ .

The precision value and the recall value will be:

$$Prec_i = \frac{TP_i}{TP_i + FP_i} = 1, \quad Rec_i = \frac{TP_i}{TP_i + FN_i} = \frac{|Y_{i.}^+| - \epsilon_i}{|Y_{i.}^+|}$$

And the  $F$ -measure $_i$  is:

$$F\text{-measure}_i = \frac{2Prec_i \times Rec_i}{Prec_i + Rec_i} = \frac{2(|Y_{i.}^+| - \epsilon_i)}{2|Y_{i.}^+| - \epsilon_i}$$

2.  $\epsilon_i$  negative labels are predicted as positive labels.

In this case, the true positive number  $TP_i$  on this instance is still  $|Y_{i.}^+|$ , and the false positive number  $FP_i = \epsilon_i$ , and the false negative number  $FN_i$  is zero.

The precision value and the recall value will be:

$$Prec_i = \frac{TP_i}{TP_i + FP_i} = \frac{|Y_{i.}^+|}{|Y_{i.}^+| + \epsilon_i}, \quad Rec_i = \frac{TP_i}{TP_i + FN_i} = 1$$

And the  $F$ -measure $_i$  is:

$$F\text{-measure}_i = \frac{2Prec_i \times Rec_i}{Prec_i + Rec_i} = \frac{2|Y_{i.}^+|}{2|Y_{i.}^+| + \epsilon_i}$$

The instance-F1 is lower bounded by the sum of minimum value of  $F$ -measure $_i$ , thus:

$$instance\text{-}F1(H) \geq \frac{1}{m} \sum_{i=1}^m \min \left\{ \frac{2(|Y_{i.}^+| - \epsilon_i)}{2|Y_{i.}^+| - \epsilon_i}, \frac{2|Y_{i.}^+|}{2|Y_{i.}^+| + \epsilon_i} \right\}$$

Under the assumption that all the instances are i.i.d drawn, micro-F1 equals instance-F1. Theorem 4 is proved.  $\square$

### A.2 Proof of Theorem 5

Because  $F$  is instance-wise effective, its order of prediction value on a specific label  $Y_{.j}$  is correct. Therefore, the threshold error  $\epsilon_j$  can happen in either the two ways:

1.  $\epsilon_j$  positive instances are predicted as negative instances.

In this case, the true positive number  $TP_j$  on this label becomes  $|Y_{.j}^+| - \epsilon_j$ , and the false positive number  $FP_j$  is zero, and the false negative number  $FN_j$  becomes  $\epsilon_j$ .

The precision value and the recall value will be:

$$Prec_j = \frac{TP_j}{TP_j + FP_j} = 1, \quad Rec_j = \frac{TP_j}{TP_j + FN_j} = \frac{|Y_{.j}^+| - \epsilon_j}{|Y_{.j}^+|}$$

And the  $F$ -measure $_j$  is:

$$F\text{-measure}_j = \frac{2Prec_j \times Rec_j}{Prec_j + Rec_j} = \frac{2(|Y_{.j}^+| - \epsilon_j)}{2|Y_{.j}^+| - \epsilon_j}$$

2.  $\epsilon_j$  negative instances are predicted as positive instances.

In this case, the true positive number  $TP_j$  on this label is still  $|Y_{.j}^+|$ , and the false positive number  $FP_j = \epsilon_j$ , and the false negative number  $FN_j$  is zero.

The precision value and the recall value will be:

$$Prec_j = \frac{TP_j}{TP_j + FP_j} = \frac{|Y_{.j}^+|}{|Y_{.j}^+| + \epsilon_j}, \quad Rec_j = \frac{TP_j}{TP_j + FN_j} = 1$$

And the  $F$ -measure $_j$  is:

$$F\text{-measure}_j = \frac{2Prec_j \times Rec_j}{Prec_j + Rec_j} = \frac{2|Y_{.j}^+|}{2|Y_{.j}^+| + \epsilon_j}$$

The macro-F1 is lower bounded by the sum of minimum value of  $F$ -measure $_j$ , thus:

$$macro\text{-}F1(H) \geq \frac{1}{l} \sum_{j=1}^l \min \left\{ \frac{2(|Y_{.j}^+| - \epsilon_j)}{2|Y_{.j}^+| - \epsilon_j}, \frac{2|Y_{.j}^+|}{2|Y_{.j}^+| + \epsilon_j} \right\}$$

Theorem 5 is proved.  $\square$

### A.3 Proof of LIMO Algorithm

**Theorem A.3.1.** *In each iteration (step 5 to step 15) of Algorithm 1, the updated direction of the model is an unbiased estimation of the gradient of this objective function:*

$$\begin{aligned} \arg \min_{\mathbf{W}, \xi} \sum_{i=1}^l \|\mathbf{w}_i\|^2 + \lambda_1 \sum_{i=1}^m \sum_{(u,v)} \xi_i^{uv} + \lambda_2 \sum_{j=1}^l \sum_{(a,b)} \xi_{ab}^j \end{aligned} \quad (1)$$

s.t.  $\mathbf{w}_u^\top \mathbf{x}_i - \mathbf{w}_v^\top \mathbf{x}_i > 1 - \xi_i^{uv}$ ,  $\xi_i^{uv} \geq 0$ , for  $i = 1, \dots, m$  and  $(u, v) \in Y_i^+ \times Y_i^-$ ,  
 $\mathbf{w}_j^\top \mathbf{x}_a - \mathbf{w}_j^\top \mathbf{x}_b > 1 - \xi_{ab}^j$ ,  $\xi_{ab}^j \geq 0$ , for  $j = 1, \dots, l$  and  $(a, b) \in Y_{.j}^+ \times Y_{.j}^-$ .

*Proof.* Suppose that the function in Equation (1) is  $f(\mathbf{W})$ , because  $\mathbf{W}$  can be decomposed into  $[\mathbf{w}_1, \mathbf{w}_2, \dots, \mathbf{w}_l]$ , we consider the partial gradient of a particular  $\mathbf{w}_k$ :

$$\begin{aligned} \frac{\partial f(\mathbf{W})}{\partial \mathbf{w}_k} = & 2\mathbf{w}_k + \lambda_1 \phi_1 + \lambda_2 \phi_2 = 2\mathbf{w}_k \\ & + \lambda_1 \sum_{i=1}^m \left\{ \llbracket k \in Y_i^- \rrbracket \mathbf{x}_i \sum_{j \in Y_i^+} \llbracket 1 - (\mathbf{w}_j - \mathbf{w}_k)^\top \mathbf{x}_i > 0 \rrbracket \right. \\ & \quad \left. - \llbracket k \in Y_i^+ \rrbracket \mathbf{x}_i \sum_{j \in Y_i^-} \llbracket 1 - (\mathbf{w}_k - \mathbf{w}_j)^\top \mathbf{x}_i > 0 \rrbracket \right\} \\ & + \lambda_2 \sum_{a \in Y_{.k}^+} \sum_{b \in Y_{.k}^-} (\mathbf{x}_b - \mathbf{x}_a) \llbracket 1 - \mathbf{w}_k^\top (\mathbf{x}_a - \mathbf{x}_b) > 0 \rrbracket \end{aligned} \quad (2)$$

The second term  $\lambda_1 \phi_1$  is the gradient of label-wise margin on  $\mathbf{w}_k$ , and the third term  $\lambda_2 \phi_2$  is the gradient of the instance-wise margin on  $\mathbf{w}_k$ .

Assume that  $(\mathbf{x}_i, y_{ik}, y_{ij})$  is picked in step 5 and 6, the direction will be computed in step 8 or 9 according to:

$$\begin{aligned} g^{label}(\mathbf{x}_i, y_{ik}, y_{ij}) = & \llbracket k \in Y_i^- \rrbracket \lambda_1 \mathbf{x}_i \llbracket 1 - (\mathbf{w}_k - \mathbf{w}_j)^\top \mathbf{x}_i > 0 \rrbracket \\ & - \llbracket k \in Y_i^+ \rrbracket \lambda_1 \mathbf{x}_i \llbracket 1 - (\mathbf{w}_j - \mathbf{w}_k)^\top \mathbf{x}_i > 0 \rrbracket + \mathbf{w}_k \end{aligned}$$

Then do the expectation:

$$\begin{aligned}
E_{\mathbf{x}_i} [E_{y_{ij}} [g^{label}(\mathbf{x}_i, y_{ik}, y_{ij})]] &= \frac{1}{C} E_{\mathbf{x}_i} \left[ \lambda_1 \mathbf{x}_i \sum_{j \in Y_i^+} \mathbb{I}[1 - (w_k - w_j)^\top \mathbf{x}_i > 0] \right. \\
&\quad \left. - \lambda_1 \mathbf{x}_i \sum_{j \in Y_i^-} \mathbb{I}[1 - (w_j - w_k)^\top \mathbf{x}_i > 0] + \frac{1}{D} \mathbf{w}_k \right] \\
&= \frac{1}{C'} \lambda_1 \phi_1 + \frac{1}{D'} \mathbf{w}_k
\end{aligned}$$

Where  $C'$  and  $D'$  are constants. Similarly, we can prove the expectation of the direction in step 11 to 15:

$$E_{\mathbf{x}_a, \mathbf{x}_b} [g^{inst}(y_k, \mathbf{x}_a, \mathbf{x}_b)] = \frac{1}{C''} \lambda_2 \phi_2 + \frac{1}{D''} \mathbf{w}_k$$

Because of the linearity of expectation, and absorbing the constants into  $\lambda_1$  and  $\lambda_2$ , the gradient  $\frac{\partial f(\mathbf{W})}{\partial \mathbf{w}_k}$  can be unbiased estimated. Namely, the updated direction of the algorithm is an unbiased estimation of the gradient of Equation (1).  $\square$

## B Appendix B: Detailed Experimental Results

In this section, detailed experimental results are included. The results of synthetic data are in Section B.1 and The results of benchmark data are in Section B.2

### B.1 Detailed Experimental Results of Synthetic Data

In this section, the detailed experimental results of synthetic data are given.

Table B.1: Original absolute value and rescaled value of experiments on ranking measures. In the left columns are absolute values, and in the right columns are rescaled relative values.

| measure        | LIMO-inst |      | LIMO  |      | LIMO  |      |
|----------------|-----------|------|-------|------|-------|------|
| ranking loss   | 0.027     | 0.00 | 0.015 | 0.99 | 0.015 | 1.00 |
| avg. precision | 0.992     | 0.00 | 0.992 | 0.58 | 0.992 | 1.00 |
| one-error      | 0.000     | 1.00 | 0.001 | 0.28 | 0.001 | 0.00 |
| coverage       | 1.576     | 0.00 | 1.557 | 0.97 | 1.556 | 1.00 |
| macro-AUC      | 0.842     | 1.00 | 0.828 | 0.00 | 0.842 | 0.98 |
| instance-AUC   | 0.973     | 0.00 | 0.985 | 0.99 | 0.985 | 1.00 |
| micro-AUC      | 0.861     | 0.14 | 0.854 | 0.00 | 0.903 | 1.00 |

Table B.2: Original absolute value and rescaled value of experiments on classification measures. In the left columns are absolute values, and in the right columns are rescaled relative values.

| measure      | LIMO-inst-t |      | LIMO-inst-t(x) |      | LIMO-label-t |      | LIMO-label-t(x) |      | LIMO-t |      | LIMO-t(x) |      |
|--------------|-------------|------|----------------|------|--------------|------|-----------------|------|--------|------|-----------|------|
| Hamming loss | 0.172       | 0.28 | 0.160          | 0.48 | 0.188        | 0.00 | 0.131           | 1.00 | 0.163  | 0.43 | 0.134     | 0.94 |
| micro-F1     | 0.837       | 0.00 | 0.860          | 0.43 | 0.840        | 0.06 | 0.890           | 1.00 | 0.858  | 0.40 | 0.885     | 0.92 |
| macro-F1     | 0.869       | 0.87 | 0.857          | 0.25 | 0.861        | 0.46 | 0.859           | 0.35 | 0.872  | 1.00 | 0.852     | 0.00 |
| instance-F1  | 0.804       | 0.00 | 0.883          | 0.79 | 0.835        | 0.32 | 0.904           | 1.00 | 0.858  | 0.54 | 0.900     | 0.96 |

### B.2 Detailed Experimental Results of Benchmark Data

The ranking results in Figure 4 in paper are computed from Table B.3. Because this table is too large, we can only rotate it to show in the next page.

Table B.3: Experimental results on eleven multi-label performance measures. For each performance measure, “↓” indicates “the smaller the better” and “↑” indicates “the larger the better”. The results are shown in mean±std(rank). The smaller the rank, the better the performance.

| Dataset | Algorithm  | hamming_loss↓ | ranking_loss↓ | avg_precision↑ | one_error↓   | coverage↓        | instance-F1↑ | instance-AUC↑ | macro-F1↑    | macro-AUC↑   | micro-F1↑    | micro-AUC↑   |
|---------|------------|---------------|---------------|----------------|--------------|------------------|--------------|---------------|--------------|--------------|--------------|--------------|
| CAL500  | BR         | .145±.003(5)  | .216±.005(4)  | .470±.008(4)   | .212±.025(5) | 143.025±2.319(4) | .354±.009(5) | .784±.005(4)  | .097±.006(5) | .544±.012(2) | .357±.011(5) | .779±.006(4) |
|         | ML-kNN     | .139±.003(3)  | .184±.005(3)  | .491±.007(3)   | .106±.023(3) | 129.789±2.426(2) | .321±.010(6) | .816±.005(3)  | .053±.002(6) | .523±.009(3) | .318±.010(6) | .813±.004(3) |
|         | GFM        | .200±.002(6)  | .522±.007(5)  | .337±.004(5)   | .000±.000(1) | 166.481±0.906(6) | .454±.006(3) | .662±.006(5)  | .183±.005(3) | .518±.013(5) | .457±.006(3) | .661±.006(5) |
|         | LIMO-inst  | .143±.004(4)  | .545±.015(6)  | .147±.004(6)   | .971±.022(6) | 162.652±1.539(5) | .386±.010(4) | .455±.015(6)  | .302±.008(1) | .566±.011(1) | .389±.010(4) | .458±.014(6) |
|         | LIMO-label | .138±.002(2)  | .180±.004(2)  | .499±.008(2)   | .105±.023(2) | 129.993±2.491(3) | .473±.004(2) | .820±.004(2)  | .126±.003(4) | .510±.011(6) | .477±.004(2) | .815±.004(2) |
|         | LIMO       | .137±.025(1)  | .178±.004(1)  | .501±.008(1)   | .122±.035(4) | 129.323±2.672(1) | .475±.006(1) | .822±.004(1)  | .288±.006(2) | .523±.011(4) | .479±.006(1) | .816±.004(1) |
| medical | BR         | .011±.001(1)  | .073±.041(5)  | .416±.100(6)   | .804±.029(6) | 3.697±1.752(5)   | .766±.022(1) | .927±.040(5)  | .384±.040(3) | .877±.038(3) | .792±.020(1) | .910±.039(5) |
|         | ML-kNN     | .016±.001(5)  | .048±.008(4)  | .788±.017(4)   | .266±.025(5) | 3.034±0.411(4)   | .564±.033(5) | .953±.007(4)  | .190±.015(6) | .797±.029(5) | .654±.028(4) | .949±.008(4) |
|         | GFM        | .025±.002(6)  | .287±.026(6)  | .692±.025(5)   | .217±.025(3) | 6.581±0.714(6)   | .636±.025(4) | .882±.013(6)  | .216±.018(4) | .650±.027(6) | .605±.027(5) | .875±.014(6) |
|         | LIMO-inst  | .015±.001(4)  | .017±.005(1)  | .881±.018(2)   | .170±.028(2) | 1.248±0.279(1)   | .444±.090(6) | .983±.005(1)  | .448±.024(2) | .901±.032(1) | .439±.087(6) | .979±.005(1) |
|         | LIMO-label | .014±.001(3)  | .032±.006(3)  | .829±.018(3)   | .217±.026(4) | 2.237±0.378(3)   | .641±.030(3) | .968±.006(3)  | .207±.012(5) | .859±.035(4) | .702±.020(3) | .960±.007(3) |
|         | LIMO       | .013±.001(2)  | .019±.006(2)  | .893±.017(1)   | .147±.027(1) | 1.423±0.350(2)   | .706±.019(2) | .981±.006(2)  | .464±.024(1) | .896±.029(2) | .757±.012(2) | .977±.006(2) |
| enron   | BR         | .070±.003(6)  | .136±.010(4)  | .539±.086(4)   | .533±.263(6) | 16.834±0.669(4)  | .482±.009(3) | .866±.010(4)  | .187±.015(3) | .631±.025(5) | .473±.008(3) | .814±.008(4) |
|         | ML-kNN     | .053±.001(3)  | .096±.004(3)  | .624±.014(3)   | .310±.022(4) | 13.615±0.423(3)  | .409±.022(5) | .904±.004(3)  | .083±.008(6) | .633±.022(4) | .461±.017(4) | .898±.003(1) |
|         | GFM        | .069±.003(5)  | .554±.027(6)  | .399±.021(6)   | .246±.041(2) | 31.645±0.764(6)  | .428±.022(4) | .669±.014(6)  | .118±.012(5) | .553±.015(6) | .437±.016(5) | .654±.011(6) |
|         | LIMO-inst  | .054±.001(4)  | .205±.008(5)  | .520±.008(5)   | .344±.013(5) | 23.679±0.804(5)  | .404±.053(6) | .796±.008(5)  | .310±.018(1) | .717±.015(1) | .414±.056(6) | .810±.006(5) |
|         | LIMO-label | .049±.001(2)  | .085±.003(2)  | .672±.010(2)   | .233±.017(1) | 12.324±0.444(2)  | .565±.011(1) | .916±.003(2)  | .137±.005(4) | .644±.019(3) | .591±.008(2) | .897±.003(2) |
|         | LIMO       | .049±.001(1)  | .083±.003(1)  | .672±.010(1)   | .253±.022(3) | 11.880±0.255(1)  | .562±.010(2) | .918±.003(1)  | .278±.017(2) | .663±.021(2) | .596±.006(1) | .896±.004(3) |
| corel5k | BR         | .014±.000(5)  | .280±.010(5)  | .077±.013(6)   | .962±.004(6) | 207.643±3.477(5) | .139±.005(4) | .720±.010(5)  | .044±.003(4) | .605±.004(4) | .158±.006(3) | .706±.009(5) |
|         | ML-kNN     | .009±.000(1)  | .135±.002(3)  | .245±.004(2)   | .736±.009(3) | 114.727±1.658(3) | .017±.002(6) | .865±.002(3)  | .009±.001(6) | .540±.007(5) | .027±.003(6) | .866±.002(3) |
|         | GFM        | .021±.001(6)  | .803±.012(6)  | .100±.005(5)   | .516±.030(1) | 320.449±2.173(6) | .150±.008(3) | .416±.012(6)  | .029±.002(5) | .516±.006(6) | .146±.011(4) | .411±.013(6) |
|         | LIMO-inst  | .010±.000(2)  | .275±.004(4)  | .105±.004(4)   | .897±.006(5) | 172.120±2.183(4) | .058±.003(5) | .725±.004(4)  | .118±.003(1) | .706±.006(1) | .057±.002(5) | .725±.004(4) |
|         | LIMO-label | .011±.000(4)  | .112±.003(1)  | .289±.006(1)   | .710±.010(2) | 99.629±2.136(2)  | .214±.004(1) | .888±.003(1)  | .050±.002(3) | .658±.006(3) | .236±.004(1) | .882±.002(1) |
|         | LIMO       | .011±.000(3)  | .116±.003(2)  | .227±.005(3)   | .791±.008(4) | 94.253±2.109(1)  | .152±.005(2) | .884±.003(2)  | .117±.004(2) | .692±.007(2) | .177±.005(2) | .881±.003(2) |
| bibtex  | BR         | .016±.001(5)  | .114±.007(3)  | .528±.012(2)   | .428±.014(2) | 32.758±1.929(4)  | .399±.009(1) | .886±.007(3)  | .318±.016(3) | .866±.007(4) | .419±.012(3) | .869±.007(4) |
|         | ML-kNN     | .014±.000(2)  | .218±.004(5)  | .339±.006(5)   | .599±.007(6) | 56.259±1.260(5)  | .160±.007(6) | .782±.004(5)  | .066±.006(6) | .661±.007(5) | .211±.007(5) | .776±.005(5) |
|         | GFM        | .037±.000(6)  | .707±.003(6)  | .210±.004(6)   | .492±.010(5) | 85.281±0.701(6)  | .223±.008(5) | .618±.003(6)  | .130±.007(5) | .575±.003(6) | .185±.007(6) | .626±.003(6) |
|         | LIMO-inst  | .014±.000(1)  | .120±.003(4)  | .494±.008(4)   | .469±.016(4) | 32.403±0.640(3)  | .392±.005(2) | .880±.003(4)  | .323±.005(2) | .921±.002(2) | .438±.006(1) | .877±.003(3) |
|         | LIMO-label | .014±.000(4)  | .071±.002(2)  | .527±.008(3)   | .433±.013(3) | 20.425±0.422(2)  | .386±.007(4) | .929±.002(2)  | .232±.004(4) | .911±.002(3) | .405±.007(4) | .917±.002(2) |
|         | LIMO       | .014±.000(3)  | .058±.001(1)  | .570±.004(1)   | .390±.008(1) | 17.447±0.357(1)  | .390±.007(3) | .942±.001(1)  | .326±.006(1) | .924±.002(1) | .435±.004(2) | .938±.002(1) |
